# Supplementary material
Source: PubMed Central journal article supplement (PMC2734335)
Supplement: NIHMS117418-supplement-1_si_001.pdf [file NIHMS117418-supplement-1_si_001.pdf]

Supplementary Information for

S K-edge XAS and DFT Calculations on

Cytochrome P450: Covalent and Ionic

Contributions to the Cysteine-Fe Bond and Their

Contribution to Reactivity

*Abhishek Dey, Yonging Jiang, Paul Ortiz de Montellano, Keith O. Hodgson, Britt*

*Hedman, Edward I. Solomon*

Full reference 25:

Frisch, M. J. T., G. W.; Schlegel, H. B.; Scuseria, G. E.; Robb, M. A.; Cheeseman, J. R.; Montgomery, Jr., J. A.; Vreven, T.; Kudin, K. N.; Burant, J. C.; Millam, J. M.; Iyengar, S. S.; Tomasi, J.; Barone, V.; Mennucci, B.; Cossi, M.; Scalmani, G.; Rega, N.; Petersson, G. A.; Nakatsuji, H.; Hada, M.; Ehara, M.; Toyota, K.; Fukuda, R.; Hasegawa, J.; Ishida, M.; Nakajima, T.; Honda, Y.; Kitao, O.; Nakai, H.; Klene, M.; Li, X.; Knox, J. E.; Hratchian, H. P.; Cross, J. B.; Bakken, V.; Adamo, C.; Jaramillo, J.; Gomperts, R.; Stratmann, R. E.; Yazyev, O.; Austin, A. J.; Cammi, R.; Pomelli, C.; Ochterski, J. W.; Ayala, P. Y.; Morokuma, K.; Voth, G. A.; Salvador, P.; Dannenberg, J. J.; Zakrzewski, V. G.; Dapprich, S.; Daniels, A. D.; Strain, M. C.; Farkas, O.; Malick, D. K.; Rabuck, A. D.; Raghavachari, K.; Foresman, J. B.; Ortiz, J. V.; Cui, Q.; Baboul, A. G.; Clifford, S.; Cioslowski, J.; Stefanov, B. B.; Liu, G.; Liashenko, A.; Piskorz, P.; Komaromi, I.; Martin, R. L.; Fox, D. J.; Keith, T.; Al-Laham, M. A.; Peng, C. Y.; Nanayakkara, A.;

Challacombe, M.; Gill, P. M. W.; Johnson, B.; Chen, W.; Wong, M. W.; Gonzalez, C.; and Pople, J. A.; C02 ed.; Gaussian, Inc.: Wallingford CT, 2004.

Optimized co-ordinates for

- 1) Resting state model A, B, C
- 2) Substrate bound high-spin state models A, B, C and model A with Imidazole and Fluoride axial ligands
- 3) Compound O models A, B, C and model A with Imidazole and Fluoride axial ligands
- 4) Compound I models A, B, C and model A with Imidazole and Fluoride axial ligands
- 5) Compound II models A, B, C and model A with Imidazole and Fluoride axial ligands
- 6) Fe(IV)=O models A, B and model A with Imidazole and Fluoride axial ligands

1A)

Fe 1.6760 0.2547 0.5091  
C 3.7194 -1.8289 -1.3183  
C 2.7691 2.9210 -1.3225  
C -0.0708 2.4026 2.5626  
C 0.6949 -2.3715 2.4224  
N 2.9968 0.4933 -1.0034  
C 3.7222 -0.4797 -1.6535  
C 4.4750 0.0983 -2.7381  
C 4.1912 1.4310 -2.7461  
C 3.2710 1.6701 -1.6621  
N 1.4374 2.2658 0.6360  
C 1.9198 3.1933 -0.2573  
C 1.4324 4.5096 0.0778  
C 0.6422 4.3688 1.1776  
C 0.6427 2.9659 1.5121  
N 0.5574 0.0647 2.1698  
C -0.1081 1.0466 2.8604  
C -0.8701 0.4714 3.9441  
C -0.6626 -0.8716 3.8964  
C 0.2292 -1.1155 2.7861  
N 2.1120 -1.7022 0.5317  
C 1.5808 -2.6359 1.3855  
C 2.1004 -3.9480 1.0790  
C 2.9614 -3.7960 0.0362  
C 2.9632 -2.3920 -0.2978  
H 4.3451 -2.4939 -1.9057  
H 3.0726 3.7604 -1.9409  
H -0.6584 3.0699 3.1856  
H 0.3536 -3.2176 3.0110  
H 5.1280 -0.4564 -3.4000  
H 4.5653 2.1951 -3.4157  
H 1.6717 5.4127 -0.4693  
H 0.0979 5.1314 1.7200  
H -1.4786 1.0377 4.6376  
H -1.0640 -1.6409 4.5437  
H 1.8357 -4.8540 1.6093  
H 3.5500 -4.5507 -0.4700  
C -0.4430 -2.4435 -1.9429  
C 0.1610 -1.0571 -2.1700  
S -0.1140 0.1085 -0.7725  
H -1.5172 -2.3734 -1.7411  
H 1.2309 -1.1263 -2.3793

H -0.3052 -0.5818 -3.0408  
O 3.3937 0.5642 1.7954  
H 3.3162 1.4633 2.1483  
H 4.1720 0.5483 1.2181  
H 0.0265 -2.9479 -1.0933  
H -0.3043 -3.0715 -2.8339

1B)

Fe 1.6430 0.2369 0.4669  
C 3.6236 -1.8586 -1.4149  
C 2.7813 2.9105 -1.3171  
C -0.1034 2.3769 2.5318  
C 0.6218 -2.4050 2.3476  
N 2.9565 0.4725 -1.0465  
C 3.6497 -0.5041 -1.7258  
C 4.4070 0.0782 -2.8047  
C 4.1595 1.4175 -2.7790  
C 3.2549 1.6557 -1.6819  
N 1.4307 2.2455 0.6245  
C 1.9340 3.1796 -0.2506  
C 1.4606 4.4974 0.0984  
C 0.6540 4.3516 1.1847  
C 0.6325 2.9442 1.4989  
N 0.5065 0.0367 2.1173  
C -0.1568 1.0180 2.8138  
C -0.9301 0.4385 3.8864  
C -0.7298 -0.9054 3.8303  
C 0.1669 -1.1467 2.7235  
N 2.0401 -1.7298 0.4565  
C 1.5077 -2.6671 1.3073  
C 2.0095 -3.9813 0.9827  
C 2.8599 -3.8286 -0.0695  
C 2.8745 -2.4225 -0.3902  
H 4.2289 -2.5256 -2.0208  
H 3.1018 3.7544 -1.9203  
H -0.6890 3.0436 3.1568  
H 0.2855 -3.2521 2.9383  
H 5.0386 -0.4783 -3.4853  
H 4.5470 2.1866 -3.4349  
H 1.7164 5.4045 -0.4341  
H 0.1093 5.1128 1.7281  
H -1.5388 1.0024 4.5814  
H -1.1387 -1.6756 4.4720  
H 1.7430 -4.8898 1.5078  
H 3.4342 -4.5853 -0.5885  
N -4.1947 1.1977 -1.8658  
C -4.5817 1.7631 -3.1349  
H -3.8828 0.2370 -1.8269  
H -4.0733 1.2231 -3.9378  
H -4.2961 2.8175 -3.1682  
H -5.6660 1.7013 -3.2967  
N -3.4777 -0.1916 0.4201  
C -4.0536 1.1346 0.5764  
C -4.4439 1.8694 -0.7190  
O -4.9318 2.9919 -0.6903  
H -2.4764 -0.2707 0.2628

H -4.9602 1.0504 1.1813  
H -3.3426 1.7695 1.1133  
N -2.1923 -2.6613 -0.2463  
C -3.5578 -2.6633 0.2375  
C -4.2674 -1.3000 0.3379  
O -5.4839 -1.2624 0.3832  
H -1.4263 -2.6541 0.4144  
H -4.1738 -3.2739 -0.4258  
H -3.5778 -3.1205 1.2323  
C -0.4430 -2.4435 -1.9429  
C -1.9219 -2.5028 -1.5774  
O -2.8140 -2.3972 -2.4091  
C 0.0258 -1.0052 -2.2332  
S -0.1489 0.1817 -0.8396  
H 0.1765 -2.8946 -1.1633  
H -0.3204 -3.0362 -2.8574  
H 1.0632 -1.0152 -2.5760  
H -0.5852 -0.5872 -3.0400  
O 3.3342 0.4806 1.7642  
H 3.2974 1.3722 2.1420  
H 4.1453 0.4194 1.2378

1C)

O -3.9907 1.8490 2.0908  
O -1.5731 0.7748 1.5331  
Fe 0.0295 0.7763 0.1927  
C 2.2043 1.4455 2.7457  
C -0.2200 4.1235 -0.4739  
C -2.1441 0.1073 -2.3617  
C 0.1421 -2.5611 0.9630  
N 0.7952 2.4473 1.0107  
C 1.7107 2.5310 2.0369  
C 2.1070 3.9134 2.2731  
C 1.3929 4.6508 1.3747  
C 0.5921 3.7378 0.5906  
C 3.1197 4.3850 3.2829  
N -1.0374 1.9019 -1.1021  
C -0.9471 3.2643 -1.2874  
C -1.6854 3.6641 -2.4790  
C -2.1825 2.5117 -3.0083  
C -1.7882 1.4308 -2.1489  
C -1.8948 5.0477 -3.0126  
N -0.8528 -0.8857 -0.5296  
C -1.7200 -0.9645 -1.5900  
C -2.1179 -2.3260 -1.8169  
C -1.4905 -3.0931 -0.8862  
C -0.6888 -2.1790 -0.0845  
C -1.5904 -4.5729 -0.7319  
N 0.9868 -0.3394 1.5747  
C 0.9303 -1.7068 1.7298  
C 1.8092 -2.1361 2.8128  
C 2.3825 -0.9909 3.2904  
C 1.8608 0.1148 2.5288  
C 2.0310 -3.5395 3.3148  
H 2.9191 1.6460 3.5380  
H -0.2518 5.1831 -0.7081

H -2.7732 -0.1103 -3.2197  
H 0.1968 -3.6215 1.1891  
H 1.4117 5.7251 1.2351  
H 3.2137 5.4747 3.2509  
H 4.1117 3.9581 3.0890  
H -2.7850 2.4015 -3.9023  
H -2.4825 5.0146 -3.9342  
H -0.9483 5.5534 -3.2353  
H -2.8012 -2.6495 -2.5921  
H -1.9803 -4.8604 0.2547  
H -0.6145 -5.0628 -0.8435  
H 3.0888 -0.8982 4.1072  
H 2.7762 -3.5435 4.1165  
H 2.3875 -4.2072 2.5214  
H 1.1086 -3.9799 3.7162  
H -2.4335 5.6831 -2.2949  
H 2.8405 4.1024 4.3063  
H -2.2594 -4.9933 -1.4886  
N 2.5604 -2.6758 -1.7728  
C 1.6143 -3.0955 -2.7927  
H 2.4149 -1.7545 -1.3689  
H 1.3848 -4.1598 -2.6822  
H 2.0188 -2.9477 -3.8017  
N 4.5594 -1.3588 -0.2326  
C 4.8245 -2.6782 -0.7730  
C 3.8105 -3.2023 -1.8043  
O 4.1216 -4.1136 -2.5601  
H 4.0416 -1.2718 0.6312  
H 5.7946 -2.6766 -1.2736  
H 4.8724 -3.3942 0.0542  
C 4.2398 1.0626 -0.4376  
C 4.7046 -0.2594 -1.0377  
O 5.1634 -0.3489 -2.1722  
C 3.0626 1.6462 -1.2332  
S 1.6034 0.5286 -1.3608  
H 3.9689 0.9506 0.6165  
H 5.0833 1.7642 -0.4961  
C -5.0499 2.5095 -1.2405  
O -5.0268 1.3591 -0.3910  
H -5.7535 3.2114 -0.7855  
H -4.4539 0.6695 -0.7721  
N -5.0391 -3.5008 1.4720  
C -5.6452 -4.1232 0.3182  
H -4.9581 -4.0443 2.3188  
H -5.0419 -4.9622 -0.0524  
H -5.7132 -3.3672 -0.4652  
H -6.6509 -4.4889 0.5543  
C -3.7774 -1.8971 2.7486  
C -4.4584 -2.2682 1.4523  
O -4.4537 -1.5205 0.4743  
H -4.2546 -2.3353 3.6311  
H -3.7708 -0.8087 2.8410  
H -2.7294 -2.2247 2.7205  
H -4.5719 1.3747 2.7019  
H -4.3774 1.6770 1.1966  
H -5.4155 2.2564 -2.2438

H -4.0714 2.9879 -1.3251  
H 2.7639 2.6130 -0.8218  
H 3.3792 1.7997 -2.2693  
H 0.6992 -2.5130 -2.6814  
H -2.3035 0.1931 1.2649  
H -2.0639 1.5614 1.8516

2A)

Fe 0.0661 -0.0044 0.1171  
S 0.0029 -0.0324 2.4235  
N 1.4373 1.5290 -0.2774  
N 1.6264 -1.3429 -0.2639  
N -1.2569 -1.5354 -0.4139  
N -1.4451 1.3372 -0.4156  
C 1.1493 2.8713 -0.3212  
C 2.8058 1.4226 -0.2721  
C 2.9695 -1.0580 -0.2590  
C 1.5164 -2.7122 -0.2991  
C -0.9629 -2.8775 -0.4379  
C -2.6182 -1.4293 -0.5661  
C -2.7813 1.0522 -0.5677  
C -1.3305 2.7070 -0.4466  
C 2.3745 3.6356 -0.3333  
C 3.4004 2.7385 -0.3049  
C 3.7306 -2.2844 -0.2812  
C 2.8308 -3.3088 -0.3041  
C -2.1777 -3.6414 -0.5935  
C -3.2023 -2.7450 -0.6753  
C -3.5329 2.2788 -0.6806  
C -2.6351 3.3031 -0.6026  
C 3.5173 0.2241 -0.2509  
C 0.3183 -3.4219 -0.3625  
C -3.3271 -0.2297 -0.6238  
C -0.1319 3.4166 -0.3810  
C -1.7761 0.0647 2.8707  
H 4.6008 0.2955 -0.2442  
H 0.3919 -4.5050 -0.3882  
H -4.4039 -0.3004 -0.7459  
H -0.2023 4.4998 -0.4128  
H 4.8117 -2.3417 -0.2852  
H 3.0270 -4.3731 -0.3325  
H 2.4295 4.7162 -0.3693  
H 4.4648 2.9364 -0.3113  
H -2.2268 -4.7217 -0.6452  
H -4.2584 -2.9445 -0.8064  
H -4.6061 2.3371 -0.8120  
H -2.8262 4.3673 -0.6593  
H -1.8486 -0.0326 3.9567  
H -2.3458 -0.7439 2.4054  
H -2.2025 1.0255 2.5718

2B)

Fe 1.721278 0.236156 0.483280  
C 2.604705 -3.093572 0.346747  
C 4.327219 0.960853 -1.646181  
C 1.172432 3.598565 0.967566  
C -0.455064 -0.435775 3.063252

|   |           |           |           |
|---|-----------|-----------|-----------|
| N | 3.116159  | -0.845419 | -0.499470 |
| C | 3.292741  | -2.227849 | -0.456030 |
| C | 4.365436  | -2.613837 | -1.346818 |
| C | 4.854586  | -1.472304 | -1.896018 |
| C | 4.081335  | -0.379418 | -1.353071 |
| N | 2.626257  | 1.937599  | -0.158076 |
| C | 3.658969  | 2.039661  | -1.078946 |
| C | 3.915802  | 3.407644  | -1.387136 |
| C | 3.010647  | 4.150856  | -0.658006 |
| C | 2.233758  | 3.223065  | 0.081281  |
| N | 0.642858  | 1.353163  | 1.795354  |
| C | 0.455322  | 2.737446  | 1.741655  |
| C | -0.600291 | 3.126660  | 2.654208  |
| C | -1.039647 | 1.993990  | 3.256791  |
| C | -0.266944 | 0.897883  | 2.708338  |
| N | 1.198861  | -1.431305 | 1.521243  |
| C | 0.227720  | -1.521823 | 2.513958  |
| C | 0.033595  | -2.879433 | 2.890316  |
| C | 0.909093  | -3.631945 | 2.128749  |
| C | 1.610481  | -2.717304 | 1.301802  |
| H | 2.846198  | -4.149465 | 0.280781  |
| H | 5.118783  | 1.178544  | -2.355740 |
| H | 0.931339  | 4.655086  | 1.020948  |
| H | -1.204177 | -0.648924 | 3.818836  |
| H | 4.699197  | -3.632462 | -1.496828 |
| H | 5.671633  | -1.355855 | -2.596185 |
| H | 4.669632  | 3.755950  | -2.080810 |
| H | 2.894910  | 5.225813  | -0.624124 |
| H | -0.939691 | 4.143962  | 2.799191  |
| H | -1.818013 | 1.882904  | 4.000480  |
| H | -0.651465 | -3.218785 | 3.656356  |
| H | 1.052786  | -4.704187 | 2.133434  |
| N | -4.244159 | 1.195744  | -1.931632 |
| C | -4.655249 | 1.711088  | -3.213815 |
| H | -3.862534 | 0.262362  | -1.869404 |
| H | -4.433006 | 0.966457  | -3.981293 |
| H | -4.123496 | 2.639342  | -3.449815 |
| H | -5.729377 | 1.928290  | -3.224568 |
| N | -3.411961 | -0.083349 | 0.382644  |
| C | -4.002752 | 1.242664  | 0.499769  |
| C | -4.447659 | 1.920095  | -0.810596 |
| O | -4.947393 | 3.039034  | -0.813751 |
| H | -2.423286 | -0.157237 | 0.152161  |
| H | -4.888643 | 1.169816  | 1.135771  |
| H | -3.286755 | 1.908983  | 0.989492  |
| N | -2.133912 | -2.583525 | -0.214157 |
| C | -3.484838 | -2.566320 | 0.303518  |
| C | -4.194321 | -1.201710 | 0.367248  |
| O | -5.407872 | -1.171929 | 0.455794  |
| H | -1.354895 | -2.605304 | 0.429388  |
| H | -4.120432 | -3.205908 | -0.312477 |
| H | -3.474499 | -2.978508 | 1.317721  |
| C | -0.427731 | -2.447530 | -1.957205 |
| C | -1.897058 | -2.477289 | -1.555305 |
| O | -2.809109 | -2.391991 | -2.367487 |
| C | 0.027056  | -1.041582 | -2.384869 |

S -0.111595 0.256736 -1.084202  
H 0.208180 -2.817526 -1.147126  
H -0.314974 -3.124781 -2.812687  
H 1.060939 -1.084463 -2.740158  
H -0.595874 -0.699867 -3.216402

2C)

Fe -0.8996 0.3390 -0.5434  
C -0.7172 -2.8949 -1.7653  
C -4.1480 -0.2079 0.3815  
C -1.4135 3.7403 -0.2390  
C 2.1855 0.9890 -1.9898  
N -2.2153 -1.2352 -0.7480  
C -1.9146 -2.5143 -1.1648  
C -3.0101 -3.4133 -0.8546  
C -3.9658 -2.6434 -0.2481  
C -3.4701 -1.2922 -0.1843  
C -3.0277 -4.8879 -1.1275  
N -2.5366 1.5600 -0.1462  
C -3.7094 1.1137 0.4192  
C -4.4144 2.2223 1.0502  
C -3.6580 3.3314 0.8074  
C -2.4830 2.9114 0.0869  
C -5.6661 2.1334 1.8654  
N 0.1589 2.0431 -1.0805  
C -0.1872 3.3367 -0.7644  
C 0.9278 4.2124 -1.0045  
C 1.9682 3.4512 -1.4580  
C 1.4653 2.0880 -1.5236  
C 3.3590 3.9063 -1.7752  
N 0.4633 -0.7368 -1.7140  
C 1.7172 -0.3205 -2.1066  
C 2.4654 -1.4377 -2.6675  
C 1.6222 -2.5144 -2.6071  
C 0.3839 -2.0748 -2.0176  
C 3.8624 -1.4055 -3.2210  
H -0.6182 -3.9380 -2.0500  
H -5.1119 -0.4229 0.8329  
H -1.5231 4.7962 -0.0108  
H 3.2048 1.1750 -2.3129  
H -4.9290 -2.9669 0.1280  
H -3.9766 -5.3315 -0.8114  
H -2.2230 -5.4061 -0.5906  
H -3.8571 4.3464 1.1294  
H -5.9890 3.1274 2.1889  
H -5.5123 1.5230 2.7643  
H 0.9242 5.2812 -0.8279  
H 3.6515 3.6532 -2.8024  
H 4.0930 3.4408 -1.1057  
H 1.8225 -3.5237 -2.9472  
H 4.1746 -2.4054 -3.5363  
H 4.5872 -1.0447 -2.4805  
H 3.9367 -0.7424 -4.0923  
H -6.4943 1.6798 1.3056  
H -2.8973 -5.1060 -2.1949  
H 3.4456 4.9910 -1.6628  
N 3.2033 0.5919 1.5037



C 3.2027 2.0054 1.8390  
H 2.2957 0.1771 1.3172  
H 4.1598 2.4511 1.5533  
H 3.0663 2.1712 2.9150  
N 2.7612 -2.2094 1.4512  
C 4.0803 -1.7032 1.7850  
C 4.1666 -0.1916 2.0590  
O 5.1128 0.2684 2.6824  
H 2.4952 -2.3048 0.4808  
H 4.4420 -2.2005 2.6868  
H 4.7667 -1.9431 0.9660  
C 0.3972 -2.6435 1.9566  
C 1.7987 -2.2690 2.4237  
O 2.0478 -2.0084 3.5940  
C -0.5959 -1.5425 2.3451  
S -0.1679 0.1092 1.6427  
H 0.3626 -2.8334 0.8791  
H 0.1101 -3.5716 2.4695  
H -1.6131 -1.8146 2.0534  
H -0.5677 -1.4041 3.4285  
H 2.3944 2.4980 1.2954

2Imz)

Fe 1.6430 0.2369 0.4669  
C 3.6236 -1.8586 -1.4149  
C 2.7813 2.9105 -1.3171  
C -0.1034 2.3769 2.5318  
C 0.6218 -2.4050 2.3476  
N 2.9565 0.4725 -1.0465  
C 3.6497 -0.5041 -1.7258  
C 4.4070 0.0782 -2.8047  
C 4.1595 1.4175 -2.7790  
C 3.2549 1.6557 -1.6819  
N 1.4307 2.2455 0.6245  
C 1.9340 3.1796 -0.2506  
C 1.4606 4.4974 0.0984  
C 0.6540 4.3516 1.1847  
C 0.6325 2.9442 1.4989  
N 0.5065 0.0367 2.1173  
C -0.1568 1.0180 2.8138  
C -0.9301 0.4385 3.8864  
C -0.7298 -0.9054 3.8303  
C 0.1669 -1.1467 2.7235  
N 2.0401 -1.7298 0.4565  
C 1.5077 -2.6671 1.3073  
C 2.0095 -3.9813 0.9827  
C 2.8599 -3.8286 -0.0695  
C 2.8745 -2.4225 -0.3902  
H 4.2289 -2.5256 -2.0208  
H 3.1018 3.7544 -1.9203  
H -0.6890 3.0436 3.1568  
H 0.2855 -3.2521 2.9383  
H 5.0386 -0.4783 -3.4853  
H 4.5470 2.1866 -3.4349  
H 1.7164 5.4045 -0.4341  
H 0.1093 5.1128 1.7281

H -1.5388 1.0024 4.5814  
H -1.1387 -1.6756 4.4720  
H 1.7430 -4.8898 1.5078  
H 3.4342 -4.5853 -0.5885  
H -2.9566 -0.5948 -1.6106  
H -1.7140 -0.4439 0.6691  
C -1.2717 -0.2841 -0.3106  
H 1.1832 0.4046 -2.3395  
N 0.0157 0.0247 -0.5521  
H -1.2993 -0.0924 -3.5536  
C 0.2149 0.1523 -1.9163  
C -1.0044 -0.0909 -2.5076  
N -1.9055 -0.3567 -1.4904  
2 F)  
Fe 1.7004 0.2931 0.5265  
C 3.6690 -1.8182 -1.3493  
C 2.8104 2.9638 -1.3093  
C -0.0360 2.4390 2.5895  
C 0.7616 -2.3503 2.5066  
N 2.9789 0.5220 -1.0513  
C 3.6961 -0.4636 -1.6816  
C 4.4765 0.1146 -2.7499  
C 4.2268 1.4560 -2.7438  
C 3.2951 1.7060 -1.6691  
N 1.4404 2.3251 0.6288  
C 1.9533 3.2481 -0.2463  
C 1.4770 4.5657 0.1063  
C 0.6804 4.4191 1.2039  
C 0.6640 3.0111 1.5268  
N 0.5869 0.0871 2.2426  
C -0.0673 1.0840 2.9201  
C -0.8041 0.5153 4.0248  
C -0.5838 -0.8306 3.9985  
C 0.2914 -1.0913 2.8790  
N 2.1252 -1.7111 0.5599  
C 1.6122 -2.6345 1.4377  
C 2.1057 -3.9479 1.1005  
C 2.9276 -3.7996 0.0209  
C 2.9390 -2.3955 -0.3100  
H 4.2817 -2.4840 -1.9494  
H 3.1446 3.8060 -1.9078  
H -0.6113 3.1119 3.2180  
H 0.4392 -3.1923 3.1117  
H 5.1272 -0.4453 -3.4095  
H 4.6328 2.2187 -3.3963  
H 1.7272 5.4742 -0.4268  
H 0.1444 5.1828 1.7529  
H -1.4108 1.0840 4.7181  
H -0.9721 -1.5891 4.6665  
H 1.8523 -4.8569 1.6313  
H 3.4807 -4.5631 -0.5114  
F 0.0714 0.0493 -0.7130

3A)

Anti

Fe 0.0488 0.0852 -0.1518

C -0.4236 3.4802 -0.1753  
C 3.4284 0.5607 -0.0412  
C 0.5245 -3.3025 0.1090  
C -3.3035 -0.3919 -0.4360  
N 1.2611 1.7070 -0.1139  
C 0.8868 3.0200 -0.1222  
C 2.0541 3.8744 -0.1008  
C 3.1372 3.0499 -0.0873  
C 2.6266 1.6960 -0.0906  
N 1.6644 -1.1406 -0.0212  
C 2.9754 -0.7526 0.0149  
C 3.8331 -1.9075 0.1583  
C 3.0179 -2.9956 0.2245  
C 1.6632 -2.5044 0.1117  
N -1.1515 -1.5278 -0.1409  
C -0.7802 -2.8379 -0.0303  
C -1.9423 -3.6957 -0.1114  
C -3.0168 -2.8783 -0.2907  
C -2.5074 -1.5247 -0.3065  
N -1.5492 1.3081 -0.2567  
C -2.8520 0.9225 -0.3979  
C -3.7131 2.0831 -0.4792  
C -2.9053 3.1725 -0.3831  
C -1.5530 2.6736 -0.2528  
H -0.5762 4.5561 -0.1809  
H 4.5037 0.7145 -0.0089  
H 0.6651 -4.3759 0.2032  
H -4.3726 -0.5468 -0.5546  
H 2.0269 4.9574 -0.0996  
H 4.1881 3.3130 -0.0695  
H 4.9148 -1.8707 0.2104  
H 3.2897 -4.0383 0.3381  
H -1.9171 -4.7768 -0.0455  
H -4.0611 -3.1461 -0.3990  
H -4.7903 2.0466 -0.5910  
H -3.1773 4.2211 -0.4027  
C -1.6433 -0.3507 2.8693  
S 0.0498 0.0954 2.3139  
H -1.6731 -0.2884 3.9640  
H -1.9163 -1.3708 2.5781  
O 0.1695 0.0841 -1.9868  
O 0.2877 -1.2066 -2.6288  
H 1.1067 -1.5524 -2.2346  
H -2.3964 0.3378 2.4702

Syn

Fe 1.878208 0.293283 0.140210  
C 3.460173 -1.298888 -2.405747  
C 2.697557 3.332493 -1.249337  
C 0.297739 1.906435 2.699382  
C 1.103411 -2.733691 1.570262  
N 2.871916 0.905679 -1.512301  
C 3.452471 0.090986 -2.441078  
C 4.079285 0.883072 -3.479500  
C 3.868793 2.186727 -3.153727  
C 3.113258 2.186217 -1.918228

|   |           |           |           |
|---|-----------|-----------|-----------|
| N | 1.558650  | 2.242947  | 0.621875  |
| C | 1.973858  | 3.349002  | -0.061947 |
| C | 1.548898  | 4.552017  | 0.622781  |
| C | 0.871485  | 4.147922  | 1.730910  |
| C | 0.886277  | 2.699131  | 1.719749  |
| N | 0.895783  | -0.304327 | 1.812404  |
| C | 0.297914  | 0.514881  | 2.733948  |
| C | -0.328970 | -0.276282 | 3.767412  |
| C | -0.102298 | -1.584252 | 3.455352  |
| C | 0.661708  | -1.590603 | 2.229589  |
| N | 2.194490  | -1.636744 | -0.331679 |
| C | 1.823638  | -2.743357 | 0.380058  |
| C | 2.279845  | -3.944121 | -0.286928 |
| C | 2.937280  | -3.538913 | -1.407104 |
| C | 2.881410  | -2.092438 | -1.420609 |
| H | 3.971190  | -1.811784 | -3.216346 |
| H | 2.959092  | 4.291108  | -1.689361 |
| H | -0.211597 | 2.419648  | 3.510908  |
| H | 0.863144  | -3.694303 | 2.017978  |
| H | 4.606479  | 0.474874  | -4.333655 |
| H | 4.185208  | 3.077351  | -3.683642 |
| H | 1.751104  | 5.560717  | 0.282488  |
| H | 0.400042  | 4.754497  | 2.495172  |
| H | -0.867860 | 0.131287  | 4.614634  |
| H | -0.417095 | -2.471361 | 3.992126  |
| H | 2.111102  | -4.952301 | 0.072530  |
| H | 3.423837  | -4.144345 | -2.162666 |
| C | -1.089308 | -1.147462 | -0.806328 |
| S | -0.120012 | 0.374174  | -1.131719 |
| H | -2.011518 | -1.102594 | -1.396869 |
| H | -1.362001 | -1.236836 | 0.250546  |
| O | 3.483792  | 0.422026  | 1.047544  |
| O | 3.817531  | -0.678214 | 1.926803  |
| H | 3.089378  | -0.642830 | 2.569520  |
| H | -0.538189 | -2.048027 | -1.097112 |

3B)

Anti

|    |         |         |         |
|----|---------|---------|---------|
| Fe | 1.7697  | 0.2403  | 0.3237  |
| C  | 3.2717  | -1.4540 | -2.2274 |
| C  | 2.4294  | 3.2117  | -1.2592 |
| C  | 0.3907  | 1.9462  | 2.9384  |
| C  | 1.0140  | -2.7321 | 1.8588  |
| N  | 2.6644  | 0.7764  | -1.4106 |
| C  | 3.2322  | -0.0663 | -2.3259 |
| C  | 3.7830  | 0.6919  | -3.4290 |
| C  | 3.5340  | 2.0038  | -3.1614 |
| C  | 2.8372  | 2.0439  | -1.8948 |
| N  | 1.4812  | 2.1999  | 0.7588  |
| C  | 1.8035  | 3.2752  | -0.0200 |
| C  | 1.4197  | 4.5051  | 0.6407  |
| C  | 0.8630  | 4.1497  | 1.8297  |
| C  | 0.8992  | 2.7031  | 1.8878  |
| N  | 0.8762  | -0.2950 | 2.0555  |
| C  | 0.3790  | 0.5551  | 3.0049  |
| C  | -0.1855 | -0.1984 | 4.1026  |

C -0.0220 -1.5156 3.7980  
C 0.6490 -1.5614 2.5171  
N 2.0565 -1.7079 -0.1089  
C 1.6936 -2.7894 0.6474  
C 2.1275 -4.0145 0.0137  
C 2.7754 -3.6523 -1.1273  
C 2.7254 -2.2085 -1.1932  
H 3.7600 -1.9965 -3.0326  
H 2.6269 4.1517 -1.7664  
H -0.0463 2.4876 3.7733  
H 0.7812 -3.6747 2.3460  
H 4.2848 0.2594 -4.2864  
H 3.7878 2.8766 -3.7507  
H 1.5694 5.4978 0.2337  
H 0.4516 4.7885 2.6021  
H -0.6430 0.2409 4.9809  
H -0.3094 -2.3854 4.3766  
H 1.9577 -5.0087 0.4093  
H 3.2448 -4.2882 -1.8684  
N -4.8008 1.0808 -1.6232  
C -5.4559 1.4748 -2.8437  
H -4.3674 0.1684 -1.5559  
H -5.0465 0.8980 -3.6770  
H -5.2910 2.5411 -3.0235  
H -6.5415 1.3069 -2.7985  
N -3.5630 0.0000 0.6023  
C -4.1852 1.3058 0.7326  
C -4.8707 1.8692 -0.5259  
O -5.4372 2.9571 -0.5175  
H -2.5777 -0.0326 0.3056  
H -4.9516 1.2600 1.5109  
H -3.4216 2.0258 1.0439  
N -2.2520 -2.4650 -0.0242  
C -3.4947 -2.4696 0.7145  
C -4.2718 -1.1422 0.7990  
O -5.4647 -1.1683 1.0752  
H -1.3949 -2.2330 0.4639  
H -4.1809 -3.1951 0.2725  
H -3.2887 -2.7841 1.7434  
C -0.8797 -2.2096 -2.0234  
C -2.2464 -2.4079 -1.3891  
O -3.2816 -2.4743 -2.0459  
C -0.5069 -0.7171 -2.2287  
S -0.4364 0.3562 -0.7363  
H -0.1092 -2.6905 -1.4148  
H -0.9129 -2.7058 -3.0014  
H 0.4621 -0.6795 -2.7347  
H -1.2417 -0.2657 -2.9066  
O 3.3792 0.3928 1.1557  
O 3.8396 -0.8061 1.8383  
H 4.5972 -0.4234 2.3109

Syn

Fe 1.7702 0.2219 0.3448  
C 3.2035 -1.5427 -2.2264  
C 2.4601 3.1406 -1.2694

C 0.3917 2.0061 2.9509  
C 1.0896 -2.6802 1.9775  
N 2.6262 0.6958 -1.4191  
C 3.1704 -0.1575 -2.3388  
C 3.7190 0.5862 -3.4510  
C 3.5048 1.9022 -3.1797  
C 2.8269 1.9580 -1.9029  
N 1.4768 2.1890 0.7628  
C 1.8392 3.2403 -0.0303  
C 1.4853 4.4920 0.6053  
C 0.9047 4.1746 1.7935  
C 0.9054 2.7296 1.8800  
N 0.8912 -0.2400 2.1154  
C 0.3919 0.6192 3.0533  
C -0.1383 -0.1210 4.1776  
C 0.0548 -1.4399 3.9019  
C 0.7065 -1.5011 2.6102  
N 2.0625 -1.7255 -0.0681  
C 1.7376 -2.7745 0.7481  
C 2.1621 -4.0212 0.1505  
C 2.7599 -3.7040 -1.0312  
C 2.6971 -2.2657 -1.1531  
H 3.6733 -2.1010 -3.0313  
H 2.6868 4.0691 -1.7864  
H -0.0415 2.5685 3.7732  
H 0.8851 -3.6110 2.4996  
H 4.2012 0.1415 -4.3132  
H 3.7745 2.7682 -3.7722  
H 1.6639 5.4721 0.1798  
H 0.5046 4.8382 2.5505  
H -0.5947 0.3272 5.0518  
H -0.2049 -2.3021 4.5046  
H 2.0164 -4.9989 0.5937  
H 3.2080 -4.3666 -1.7618  
N -4.9321 0.9168 -1.7422  
C -5.6250 1.1499 -2.9846  
H -4.4824 0.0256 -1.5765  
H -5.2320 0.4720 -3.7470  
H -5.4707 2.1848 -3.3024  
H -6.7070 0.9844 -2.8878  
N -3.6164 0.1371 0.5566  
C -4.2649 1.4357 0.5534  
C -4.9939 1.8267 -0.7441  
O -5.5797 2.8989 -0.8521  
H -2.6237 0.0973 0.2964  
H -5.0079 1.4691 1.3555  
H -3.5118 2.2048 0.7482  
N -2.2540 -2.3471 0.1871  
C -3.4744 -2.2989 0.9608  
C -4.2881 -0.9909 0.9125  
O -5.4721 -1.0070 1.2189  
H -1.3999 -1.9859 0.6004  
H -4.1506 -3.0850 0.6188  
H -3.2288 -2.4946 2.0105  
C -0.9452 -2.2636 -1.8639  
C -2.2920 -2.4381 -1.1775

O -3.3415 -2.6328 -1.7862  
C -0.5810 -0.7803 -2.1231  
S -0.4216 0.2934 -0.6369  
H -0.1553 -2.7310 -1.2698  
H -1.0109 -2.7871 -2.8251  
H 0.3567 -0.7502 -2.6854  
H -1.3543 -0.3325 -2.7576  
O 3.3507 0.3481 1.2438  
O 4.4841 -0.2988 0.5966  
H 5.1691 -0.0805 1.2464

3C)

O -6.2174 -0.0876 -0.6977  
O -1.1697 1.1219 1.5380  
O -2.5140 1.0128 1.0030  
Fe 0.1602 0.8300 0.3091  
C 2.5774 1.1319 2.7345  
C 0.3099 4.1770 -0.2666  
C -1.9181 0.4328 -2.3624  
C -0.0871 -2.5233 1.0017  
N 1.2139 2.3547 1.1118  
C 2.1848 2.2925 2.0798  
C 2.7521 3.6117 2.3347  
C 2.0687 4.4599 1.5112  
C 1.1239 3.6703 0.7477  
C 3.8824 3.9211 3.2859  
N -0.6877 2.0736 -1.0187  
C -0.5029 3.4268 -1.1124  
C -1.2132 3.9520 -2.2774  
C -1.7819 2.8717 -2.8795  
C -1.4640 1.7139 -2.0815  
C -1.3208 5.3798 -2.7155  
N -0.8258 -0.7318 -0.5057  
C -1.6438 -0.6968 -1.6049  
C -2.2077 -1.9983 -1.8490  
C -1.7449 -2.8308 -0.8774  
C -0.8521 -2.0284 -0.0518  
C -2.1114 -4.2649 -0.6651  
N 1.0599 -0.4479 1.6248  
C 0.8337 -1.7954 1.7550  
C 1.7201 -2.3667 2.7675  
C 2.4674 -1.3209 3.2286  
C 2.0444 -0.1364 2.5217  
C 1.8109 -3.8045 3.2031  
H 3.3598 1.2167 3.4836  
H 0.3641 5.2472 -0.4470  
H -2.5599 0.3087 -3.2297  
H -0.1770 -3.5837 1.2197  
H 2.2050 5.5305 1.4036  
H 4.1065 4.9933 3.2833  
H 4.8013 3.3871 3.0092  
H -2.3806 2.8564 -3.7832  
H -1.8972 5.4534 -3.6436  
H -0.3377 5.8349 -2.8967  
H -2.9069 -2.2309 -2.6436  
H -2.6203 -4.4146 0.2973

H -1.2338 -4.9245 -0.6718  
H 3.2379 -1.3451 3.9915  
H 2.5758 -3.9228 3.9779  
H 2.0718 -4.4702 2.3696  
H 0.8601 -4.1702 3.6150  
H -1.8239 6.0014 -1.9609  
H 3.6413 3.6332 4.3182  
H -2.7881 -4.6081 -1.4548  
N 2.2023 -2.8350 -1.9144  
C 1.1452 -3.1390 -2.8621  
H 2.2000 -1.8875 -1.5236  
H 0.7342 -4.1369 -2.6707  
H 1.5197 -3.1296 -3.8937  
N 4.4504 -1.8621 -0.4167  
C 4.4849 -3.1769 -1.0244  
C 3.3595 -3.5265 -2.0110  
O 3.5134 -4.4668 -2.7867  
H 3.9078 -1.7319 0.4277  
H 5.4187 -3.2882 -1.5796  
H 4.4755 -3.9302 -0.2279  
C 4.4707 0.5849 -0.5283  
C 4.6825 -0.7606 -1.2046  
O 5.0376 -0.8731 -2.3732  
C 3.3599 1.3667 -1.2437  
S 1.7856 0.4308 -1.3977  
H 4.2246 0.4615 0.5314  
H 5.4180 1.1410 -0.5918  
C -4.6759 3.2039 -0.8325  
O -4.8563 2.2706 0.2227  
H -5.6400 3.3187 -1.3440  
H -3.9630 1.9491 0.4855  
N -5.2864 -2.9109 1.7863  
C -6.0194 -3.3453 0.6107  
H -5.6332 -3.1607 2.6997  
H -6.7145 -4.1362 0.9004  
H -5.3276 -3.7385 -0.1390  
H -6.5716 -2.5093 0.1666  
C -3.7667 -1.4382 2.9854  
C -4.3731 -1.9091 1.6945  
O -4.0388 -1.4326 0.6078  
H -4.1728 -1.9353 3.8725  
H -3.9108 -0.3571 3.0703  
H -2.6833 -1.6003 2.9512  
H -5.4268 -0.6469 -0.6247  
H -5.8863 0.7635 -0.3389  
H -2.6299 0.0582 0.8303  
H -3.9291 2.8811 -1.5618  
H -4.3725 4.1912 -0.4514  
H 3.1873 2.3187 -0.7330  
H 3.6898 1.5831 -2.2643  
H 0.3564 -2.3975 -2.7546

3 Imz)

Fe 1.8203 0.2195 0.5303  
C 3.6097 -1.8715 -1.4774  
C 2.8460 2.9063 -1.3556



C 0.0177 2.3287 2.5301  
C 0.7132 -2.4643 2.3547  
N 2.9750 0.4699 -1.1078  
C 3.6653 -0.5138 -1.7689  
C 4.4532 0.0596 -2.8363  
C 4.2357 1.4030 -2.8065  
C 3.3165 1.6502 -1.7194  
N 1.4752 2.2137 0.5566  
C 1.9911 3.1608 -0.2898  
C 1.5374 4.4784 0.0937  
C 0.7469 4.3152 1.1886  
C 0.7176 2.8978 1.4723  
N 0.6027 -0.0235 2.1232  
C -0.0279 0.9713 2.8332  
C -0.7670 0.4028 3.9344  
C -0.5751 -0.9468 3.8844  
C 0.2824 -1.2043 2.7536  
N 2.0742 -1.7703 0.4349  
C 1.5560 -2.7172 1.2796  
C 2.0219 -4.0330 0.9043  
C 2.8390 -3.8652 -0.1697  
C 2.8684 -2.4475 -0.4520  
H 4.2048 -2.5373 -2.0954  
H 3.1902 3.7575 -1.9355  
H -0.5362 3.0008 3.1791  
H 0.3814 -3.3158 2.9416  
H 5.0879 -0.5063 -3.5066  
H 4.6541 2.1694 -3.4469  
H 1.8052 5.3955 -0.4158  
H 0.2293 5.0707 1.7667  
H -1.3478 0.9740 4.6480  
H -0.9665 -1.7078 4.5481  
H 1.7564 -4.9504 1.4146  
H 3.3852 -4.6160 -0.7270  
O 3.2743 0.4800 1.5311  
H -2.9294 -0.5472 -1.3726  
H -1.4150 -0.4512 0.6724  
C -1.1045 -0.2848 -0.3464  
H 0.9576 0.3733 -2.6817  
N 0.1246 0.0043 -0.7382  
H -1.6458 -0.0634 -3.5333  
C 0.0738 0.1375 -2.1119  
C -1.2046 -0.0762 -2.5491  
N -1.9418 -0.3442 -1.4118  
O 3.4199 -0.4363 2.6337  
H 2.9221 0.0345 3.3263  
3 Fluoride)  
Fe 1.8681 0.3509 0.6524  
C 3.6700 -1.7848 -1.3391  
C 2.8450 2.9810 -1.2647  
C -0.0990 2.4448 2.5329  
C 0.8725 -2.2926 2.5779  
N 3.0369 0.5549 -0.9740  
C 3.7009 -0.4287 -1.6492  
C 4.4472 0.1361 -2.7551  
C 4.2220 1.4774 -2.7285

C 3.3347 1.7253 -1.6103  
N 1.4459 2.3258 0.6375  
C 1.9610 3.2510 -0.2249  
C 1.4410 4.5682 0.0823  
C 0.6038 4.4167 1.1441  
C 0.6195 3.0081 1.4833  
N 0.6335 0.1270 2.2499  
C -0.0829 1.0996 2.8864  
C -0.8282 0.5344 3.9929  
C -0.5450 -0.7963 4.0098  
C 0.3692 -1.0386 2.9115  
N 2.2378 -1.6477 0.6430  
C 1.7194 -2.5737 1.5093  
C 2.1588 -3.9011 1.1412  
C 2.9370 -3.7631 0.0305  
C 2.9754 -2.3507 -0.2746  
H 4.2346 -2.4567 -1.9806  
H 3.1708 3.8234 -1.8698  
H -0.7180 3.1108 3.1287  
H 0.5546 -3.1324 3.1907  
H 5.0559 -0.4351 -3.4462  
H 4.6054 2.2414 -3.3947  
H 1.6935 5.4738 -0.4569  
H 0.0244 5.1716 1.6628  
H -1.4760 1.0974 4.6546  
H -0.9124 -1.5577 4.6881  
H 1.8910 -4.8093 1.6686  
H 3.4418 -4.5336 -0.5406  
F 0.4553 0.0629 -0.4323  
O 3.2329 0.7077 1.8140  
O 4.4890 0.0143 1.5416  
H 4.1764 -0.9074 1.5226

4 A)

Fe 0.2931 0.0834 0.2815  
C 2.0347 -2.0344 -1.7704  
C 1.2324 2.7370 -1.6689  
C -1.6667 2.1711 2.1613  
C -0.9358 -2.6085 2.0070  
N 1.3652 0.2995 -1.4145  
C 2.0649 -0.6804 -2.0747  
C 2.8363 -0.1057 -3.1499  
C 2.6041 1.2352 -3.1259  
C 1.6939 1.4797 -2.0341  
N -0.1577 2.0502 0.2308  
C 0.3784 2.9955 -0.6065  
C -0.0790 4.3123 -0.2336  
C -0.8928 4.1534 0.8450  
C -0.9334 2.7398 1.1295  
N -1.0634 -0.1728 1.7544  
C -1.7204 0.8144 2.4477  
C -2.4887 0.2422 3.5258  
C -2.2835 -1.1022 3.4823  
C -1.3890 -1.3507 2.3779  
N 0.4646 -1.9208 0.1118  
C -0.0661 -2.8652 0.9559

C 0.4139 -4.1784 0.6024  
 C 1.2562 -4.0168 -0.4547  
 C 1.2875 -2.6049 -0.7491  
 H 2.6436 -2.6979 -2.3767  
 H 1.5782 3.5853 -2.2513  
 H -2.2403 2.8397 2.7956  
 H -1.2770 -3.4565 2.5925  
 H 3.4696 -0.6701 -3.8227  
 H 3.0066 2.0025 -3.7748  
 H 0.1976 5.2265 -0.7432  
 H -1.4260 4.9095 1.4070  
 H -3.0998 0.8112 4.2147  
 H -2.6903 -1.8692 4.1290  
 H 0.1364 -5.0924 1.1119  
 H 1.8145 -4.7706 -0.9952  
 C -1.6397 -1.3398 -2.6537  
 S -2.0015 -0.1231 -1.3675  
 H -2.5049 -1.5273 -3.2919  
 H -1.3037 -2.2676 -2.1778  
 O 1.5494 0.2489 1.2677  
 H -0.8000 -0.9689 -3.2536  
 4B)  
 Fe 1.942222 0.236574 0.647847  
 C 2.517650 -3.114596 0.220744  
 C 4.143529 0.933401 -1.865303  
 C 1.120101 3.545976 0.852568  
 C -0.469357 -0.492992 2.980130  
 N 3.064161 -0.869806 -0.606014  
 C 3.225838 -2.232450 -0.585909  
 C 4.231527 -2.634289 -1.539027  
 C 4.684423 -1.496388 -2.131837  
 C 3.957275 -0.402240 -1.536883  
 N 2.511970 1.899754 -0.313834  
 C 3.464576 2.000679 -1.293750  
 C 3.655719 3.380080 -1.672408  
 C 2.801683 4.114380 -0.910744  
 C 2.094475 3.181046 -0.067230  
 N 0.582955 1.307405 1.688497  
 C 0.424390 2.669557 1.673523  
 C -0.569687 3.073124 2.637867  
 C -1.004626 1.937164 3.247887  
 C -0.281832 0.841604 2.647603  
 N 1.123016 -1.468751 1.387790  
 C 0.178722 -1.565369 2.384563  
 C -0.038203 -2.947368 2.733399  
 C 0.805555 -3.687075 1.958013  
 C 1.536782 -2.756989 1.135006  
 H 2.753667 -4.170490 0.130203  
 H 4.879733 1.161854 -2.629602  
 H 0.886279 4.602304 0.939404  
 H -1.186833 -0.715410 3.763856  
 H 4.537336 -3.657189 -1.717232  
 H 5.440568 -1.388541 -2.898700  
 H 4.351544 3.720403 -2.428288  
 H 2.646702 5.185461 -0.907950  
 H -0.881176 4.095013 2.810632

|   |           |           |           |
|---|-----------|-----------|-----------|
| H | -1.746110 | 1.831231  | 4.029256  |
| H | -0.727796 | -3.289942 | 3.494687  |
| H | 0.943004  | -4.760829 | 1.946256  |
| N | -3.955786 | 1.480086  | -1.862408 |
| C | -4.147545 | 2.127053  | -3.137607 |
| H | -3.792331 | 0.482935  | -1.835957 |
| H | -3.629628 | 1.555397  | -3.911912 |
| H | -3.738045 | 3.139292  | -3.097707 |
| H | -5.210412 | 2.201975  | -3.402404 |
| N | -3.667347 | -0.059974 | 0.427326  |
| C | -4.069253 | 1.330765  | 0.579238  |
| C | -4.224787 | 2.147630  | -0.716434 |
| O | -4.554730 | 3.325826  | -0.686948 |
| H | -2.680756 | -0.275497 | 0.326598  |
| H | -5.036073 | 1.354863  | 1.088335  |
| H | -3.339212 | 1.846884  | 1.209785  |
| N | -2.677721 | -2.665346 | -0.225078 |
| C | -4.071692 | -2.490076 | 0.132789  |
| C | -4.591149 | -1.043304 | 0.223246  |
| O | -5.788481 | -0.835489 | 0.160167  |
| H | -1.993649 | -2.859237 | 0.494303  |
| H | -4.701224 | -2.989343 | -0.606856 |
| H | -4.248168 | -2.966423 | 1.102632  |
| C | -0.775532 | -2.727080 | -1.764070 |
| C | -2.268113 | -2.532516 | -1.521934 |
| O | -3.048336 | -2.259501 | -2.423797 |
| C | -0.082539 | -1.414308 | -2.170975 |
| S | -0.202728 | -0.072686 | -0.936048 |
| H | -0.279057 | -3.157390 | -0.889642 |
| H | -0.672975 | -3.439241 | -2.592062 |
| H | 0.966716  | -1.597530 | -2.414802 |
| H | -0.574305 | -1.016154 | -3.067752 |
| O | 3.069266  | 0.304361  | 1.796691  |

4C)

|    |         |         |         |
|----|---------|---------|---------|
| O  | -5.1718 | -0.7369 | -1.8649 |
| O  | -1.0688 | 1.0656  | 1.5863  |
| O  | -3.7729 | 1.5306  | 1.8722  |
| Fe | 0.0483  | 0.8556  | 0.4289  |
| C  | 2.6055  | 1.2481  | 2.6726  |
| C  | 0.2508  | 4.1718  | -0.3799 |
| C  | -2.1484 | 0.3685  | -2.1337 |
| C  | 0.0737  | -2.5311 | 1.0251  |
| N  | 1.2048  | 2.3951  | 1.0233  |
| C  | 2.1820  | 2.3831  | 1.9950  |
| C  | 2.7277  | 3.7143  | 2.2023  |
| C  | 2.0393  | 4.5238  | 1.3440  |
| C  | 1.1003  | 3.7046  | 0.6204  |
| C  | 3.8412  | 4.0803  | 3.1529  |
| N  | -0.8100 | 2.0445  | -0.9456 |
| C  | -0.6162 | 3.3936  | -1.1350 |
| C  | -1.3921 | 3.8689  | -2.2749 |
| C  | -2.0283 | 2.7713  | -2.7646 |
| C  | -1.6727 | 1.6546  | -1.9346 |
| C  | -1.4861 | 5.2713  | -2.7986 |
| N  | -0.8315 | -0.7517 | -0.3948 |
| C  | -1.7577 | -0.7436 | -1.4047 |

C -2.2757 -2.0611 -1.6378  
C -1.6830 -2.8953 -0.7433  
C -0.7724 -2.0632 0.0307  
C -1.9449 -4.3564 -0.5745  
N 1.1611 -0.4066 1.5715  
C 0.9887 -1.7627 1.7395  
C 1.8967 -2.2815 2.7535  
C 2.6040 -1.1976 3.1927  
C 2.1347 -0.0433 2.4734  
C 2.0129 -3.7065 3.2298  
H 3.3785 1.3763 3.4242  
H 0.3019 5.2316 -0.6104  
H -2.9088 0.2137 -2.8904  
H 0.0325 -3.5918 1.2513  
H 2.1630 5.5901 1.1977  
H 4.0456 5.1548 3.1019  
H 4.7707 3.5525 2.9042  
H -2.6951 2.7138 -3.6155  
H -2.1402 5.2977 -3.6794  
H -0.5062 5.6597 -3.1061  
H -3.0398 -2.2873 -2.3690  
H -2.3720 -4.5854 0.4085  
H -1.0222 -4.9553 -0.6710  
H 3.3718 -1.1756 3.9570  
H 2.8085 -3.7916 3.9797  
H 2.2560 -4.3937 2.4080  
H 1.0842 -4.0607 3.6860  
H -1.8942 5.9599 -2.0570  
H 3.5896 3.8347 4.1885  
H -2.6431 -4.7102 -1.3362  
N 2.2963 -2.8506 -1.8738  
C 1.2448 -3.1676 -2.8358  
H 2.2842 -1.9168 -1.4725  
H 0.9147 -4.2036 -2.6997  
H 1.6116 -3.0738 -3.8671  
N 4.5608 -1.7637 -0.4643  
C 4.6261 -3.0934 -1.0396  
C 3.4880 -3.4932 -1.9935  
O 3.6543 -4.4191 -2.7712  
H 4.1591 -1.6390 0.4544  
H 5.5479 -3.1936 -1.6160  
H 4.6579 -3.8249 -0.2251  
C 4.5435 0.6840 -0.5976  
C 4.7651 -0.6697 -1.2600  
O 5.0702 -0.7728 -2.4399  
C 3.4287 1.4370 -1.3356  
S 1.8648 0.4948 -1.4499  
H 4.3009 0.5832 0.4651  
H 5.4767 1.2571 -0.6762  
C -4.7453 3.0247 -0.8322  
O -5.2484 1.7508 -0.4690  
H -5.3269 3.8378 -0.3813  
H -4.8480 1.5302 0.4021  
N -5.1379 -3.0165 1.8740  
C -5.8623 -3.5371 0.7404  
H -5.2130 -3.4884 2.7623

H -6.8350 -3.9182 1.0564  
H -5.3126 -4.3597 0.2462  
H -6.0068 -2.7421 0.0102  
C -3.6389 -1.5199 3.0506  
C -4.3228 -1.9350 1.7773  
O -4.1445 -1.3201 0.7252  
H -3.8898 -2.1445 3.9127  
H -3.8924 -0.4789 3.2520  
H -2.5520 -1.5519 2.8910  
H -4.7846 -1.1307 -1.0615  
H -5.3112 0.1833 -1.5567  
H -2.9208 1.1221 1.5999  
H -4.8217 3.1198 -1.9239  
H -3.6937 3.1491 -0.5514  
H 3.2494 2.4205 -0.8939  
H 3.7330 1.5828 -2.3784  
H 0.4081 -2.4962 -2.6806  
H -3.4996 2.3932 2.2193

4 Imz)

Fe 1.7627 0.2602 0.5769  
C 3.6300 -1.8391 -1.3728  
C 2.8152 2.9257 -1.2929  
C -0.0927 2.3629 2.5242  
C 0.6383 -2.4171 2.3769  
N 2.9883 0.4984 -1.0178  
C 3.6686 -0.4812 -1.6912  
C 4.4426 0.0842 -2.7688  
C 4.2074 1.4262 -2.7519  
C 3.2969 1.6685 -1.6598  
N 1.4556 2.2599 0.6302  
C 1.9501 3.1984 -0.2335  
C 1.4669 4.5142 0.1099  
C 0.6495 4.3565 1.1871  
C 0.6380 2.9450 1.4887  
N 0.5325 0.0211 2.1629  
C -0.1462 1.0023 2.8357  
C -0.9309 0.4350 3.9033  
C -0.7320 -0.9137 3.8573  
C 0.1773 -1.1570 2.7654  
N 2.0703 -1.7390 0.5093  
C 1.5210 -2.6866 1.3315  
C 2.0129 -4.0009 0.9943  
C 2.8679 -3.8364 -0.0522  
C 2.8842 -2.4242 -0.3494  
H 4.2355 -2.5040 -1.9816  
H 3.1422 3.7712 -1.8910  
H -0.6851 3.0307 3.1427  
H 0.2842 -3.2676 2.9522  
H 5.0824 -0.4792 -3.4352  
H 4.6147 2.1896 -3.4018  
H 1.7325 5.4268 -0.4071  
H 0.1061 5.1132 1.7372  
H -1.5430 1.0018 4.5925  
H -1.1467 -1.6776 4.5020  
H 1.7426 -4.9148 1.5068

H 3.4411 -4.5878 -0.5791  
O 3.0365 0.4224 1.5728  
H -2.9289 -0.5828 -1.4702  
H -1.5205 -0.4080 0.6290  
C -1.1577 -0.2606 -0.3753  
H 0.9822 0.3772 -2.6534  
N 0.0869 0.0448 -0.7195  
H -1.5680 -0.1222 -3.5842  
C 0.0884 0.1374 -2.1019  
C -1.1677 -0.1059 -2.5827  
N -1.9434 -0.3600 -1.4714  
4 Fluoride)  
Fe -0.0040 0.0062 -0.0888  
C 3.3926 0.3502 -0.0132  
C 0.3484 -3.3912 0.0198  
C -3.3959 -0.3491 -0.0139  
C -0.3509 3.3955 0.0164  
N 1.5721 -1.2769 -0.0126  
C 2.8967 -0.9524 -0.0117  
C 3.7151 -2.1446 0.0082  
C 2.8560 -3.1994 0.0213  
C 1.5225 -2.6398 0.0077  
N -1.2810 -1.5698 -0.0117  
C -0.9542 -2.8938 0.0127  
C -2.1453 -3.7136 0.0315  
C -3.2019 -2.8566 0.0169  
C -2.6444 -1.5228 -0.0086  
N -1.5717 1.2785 -0.0153  
C -2.8969 0.9530 -0.0108  
C -3.7153 2.1441 0.0137  
C -2.8570 3.2000 0.0264  
C -1.5238 2.6422 0.0079  
N 1.2753 1.5731 -0.0149  
C 0.9514 2.8982 0.0086  
C 2.1433 3.7156 0.0296  
C 3.1982 2.8561 0.0184  
C 2.6388 1.5233 -0.0080  
H 4.4733 0.4632 -0.0080  
H 0.4590 -4.4719 0.0395  
H -4.4768 -0.4589 -0.0091  
H -0.4628 4.4760 0.0363  
H 4.7974 -2.1543 0.0154  
H 3.0847 -4.2572 0.0409  
H -2.1531 -4.7957 0.0549  
H -4.2594 -3.0870 0.0267  
H -4.7975 2.1527 0.0243  
H -3.0865 4.2575 0.0491  
H 2.1533 4.7977 0.0527  
H 4.2561 3.0843 0.0311  
F 0.0075 -0.0154 1.7312  
O 0.0058 -0.0171 -1.7339

5A)

Anti

Fe 1.5589 0.2396 0.4035  
C 3.6516 -1.8299 -1.3583

C 2.6990 2.9093 -1.3775  
C -0.0206 2.3896 2.5812  
C 0.5524 -2.4005 2.3074  
N 2.9000 0.4845 -1.0452  
C 3.6428 -0.4721 -1.6813  
C 4.4181 0.1037 -2.7693  
C 4.1264 1.4229 -2.7949  
C 3.1839 1.6643 -1.7118  
N 1.4005 2.2277 0.5879  
C 1.8825 3.1672 -0.2739  
C 1.4657 4.5074 0.1206  
C 0.7223 4.3671 1.2387  
C 0.6731 2.9413 1.5276  
N 0.5245 0.0425 2.1079  
C -0.0919 1.0195 2.8411  
C -0.8667 0.4490 3.9327  
C -0.7284 -0.8911 3.8413  
C 0.1438 -1.1440 2.7003  
N 2.0173 -1.6966 0.4631  
C 1.4588 -2.6473 1.2755  
C 1.9745 -3.9709 0.9617  
C 2.8631 -3.8116 -0.0438  
C 2.8842 -2.3901 -0.3596  
H 4.2918 -2.4842 -1.9400  
H 3.0047 3.7539 -1.9852  
H -0.5595 3.0576 3.2442  
H 0.1806 -3.2538 2.8641  
H 5.0885 -0.4553 -3.4086  
H 4.5056 2.1882 -3.4592  
H 1.7311 5.4131 -0.4087  
H 0.2384 5.1305 1.8333  
H -1.4318 1.0265 4.6522  
H -1.1522 -1.6617 4.4718  
H 1.6836 -4.8796 1.4719  
H 3.4630 -4.5603 -0.5444  
C 0.1350 -1.0796 -2.2308  
S -0.1993 0.0881 -0.8690  
H -0.7765 -1.0965 -2.8364  
H 0.3280 -2.0902 -1.8636  
H 0.9639 -0.7473 -2.8604

#### Syn

Fe -0.0493 0.0013 -0.2157  
C 3.3513 -0.2906 -0.4112  
C -0.3536 -3.4011 -0.2242  
C -3.4799 0.2970 -0.1118  
C 0.2317 3.4012 -0.0696  
N 1.2431 -1.5334 -0.2638  
C 2.6073 -1.4611 -0.3786  
C 3.1684 -2.7876 -0.4505  
C 2.1262 -3.6602 -0.3824  
C 0.9256 -2.8695 -0.2767  
N -1.6080 -1.2903 -0.1913  
C -1.5259 -2.6603 -0.1859  
C -2.8470 -3.2331 -0.1490  
C -3.7270 -2.1941 -0.1285



C -2.9451 -0.9839 -0.1470  
N -1.3656 1.5413 -0.1225  
C -2.7343 1.4670 -0.0916  
C -3.2993 2.7925 -0.0193  
C -2.2550 3.6644 0.0033  
C -1.0508 2.8736 -0.0612  
N 1.4815 1.2864 -0.1993  
C 1.3993 2.6577 -0.1507  
C 2.7177 3.2326 -0.2252  
C 3.5948 2.1971 -0.3378  
C 2.8153 0.9856 -0.3238  
H 4.4285 -0.3796 -0.5066  
H -0.4461 -4.4823 -0.2293  
H -4.5606 0.3889 -0.0794  
H 0.3293 4.4812 -0.0270  
H 4.2254 -3.0025 -0.5426  
H 2.1473 -4.7421 -0.4088  
H -3.0551 -4.2952 -0.1409  
H -4.8086 -2.2249 -0.0976  
H -4.3599 3.0061 0.0147  
H -2.2772 4.7452 0.0572  
H 2.9252 4.2947 -0.2030  
H 4.6732 2.2313 -0.4251  
C 1.5668 -0.0761 2.7428  
S -0.1420 -0.0809 2.0973  
H 1.4829 -0.1426 3.8322  
H 2.0928 0.8463 2.4854  
O -0.1292 0.0497 -2.0232  
H -1.0331 0.0187 -2.3705  
H 2.1367 -0.9357 2.3818

5 A)

Anti

Fe 1.7516 0.2580 0.5342  
C 3.6505 -1.9360 -1.2665  
C 2.8239 2.8332 -1.4250  
C 0.0395 2.4709 2.5151  
C 0.4687 -2.3534 2.3693  
N 2.9531 0.4093 -1.0559  
C 3.6865 -0.5983 -1.6336  
C 4.4871 -0.0698 -2.7093  
C 4.2302 1.2654 -2.7728  
C 3.2833 1.5596 -1.7271  
N 1.4798 2.2496 0.5412  
C 2.0027 3.1470 -0.3537  
C 1.6017 4.4874 -0.0015  
C 0.8414 4.3878 1.1213  
C 0.7665 2.9851 1.4514  
N 0.5057 0.0909 2.1251  
C -0.0889 1.1210 2.8110  
C -0.9067 0.5969 3.8761  
C -0.8080 -0.7598 3.8201  
C 0.0791 -1.0687 2.7265  
N 1.9857 -1.7463 0.5306  
C 1.3819 -2.6568 1.3650  
C 1.8656 -3.9831 1.0770  
C 2.7802 -3.8613 0.0736

C 2.8492 -2.4633 -0.2633  
H 4.2841 -2.6246 -1.8157  
H 3.1677 3.6509 -2.0500  
H -0.4888 3.1753 3.1490  
H 0.0761 -3.1782 2.9559  
H 5.1511 -0.6603 -3.3273  
H 4.6429 2.0010 -3.4510  
H 1.8791 5.3759 -0.5535  
H 0.3576 5.1765 1.6827  
H -1.4797 1.2043 4.5646  
H -1.2787 -1.4978 4.4569  
H 1.5463 -4.8792 1.5936  
H 3.3615 -4.6378 -0.4066  
N -4.1158 1.2858 -1.8429  
C -4.4435 1.9111 -3.1012  
H -3.8292 0.3167 -1.8329  
H -3.9110 1.3980 -3.9060  
H -4.1414 2.9611 -3.0769  
H -5.5211 1.8738 -3.3079  
N -3.5264 -0.2144 0.4134  
C -4.0821 1.1169 0.5998  
C -4.4006 1.9133 -0.6790  
O -4.8674 3.0432 -0.6218  
H -2.5219 -0.3092 0.2956  
H -5.0160 1.0273 1.1606  
H -3.3835 1.7134 1.1939  
N -2.2631 -2.6781 -0.3126  
C -3.6469 -2.6738 0.1178  
C -4.3337 -1.3015 0.2501  
O -5.5495 -1.2394 0.2447  
H -1.5234 -2.7318 0.3752  
H -4.2474 -3.2426 -0.5950  
H -3.7145 -3.1730 1.0899  
C -0.4437 -2.4528 -1.9333  
C -1.9373 -2.4749 -1.6250  
O -2.7921 -2.3142 -2.4856  
C 0.0637 -1.0251 -2.2046  
S -0.1243 0.1521 -0.8052  
H 0.1357 -2.9179 -1.1317  
H -0.2969 -3.0460 -2.8437  
H 1.1088 -1.0501 -2.5212  
H -0.5201 -0.5872 -3.0210  
O 3.1468 0.4166 1.6462  
H 3.1130 -0.2098 2.3861  
Syn  
Fe 1.7471 0.2483 0.5586  
C 3.6492 -1.9073 -1.2989  
C 2.8474 2.8674 -1.3512  
C -0.0771 2.4176 2.4815  
C 0.5230 -2.3864 2.3749  
N 2.9580 0.4320 -1.0341  
C 3.6815 -0.5634 -1.6409  
C 4.4850 -0.0146 -2.7047  
C 4.2436 1.3243 -2.7298  
C 3.3000 1.5983 -1.6760  
N 1.4740 2.2469 0.5830

C 1.9991 3.1611 -0.2950  
C 1.5423 4.4854 0.0404  
C 0.7290 4.3601 1.1246  
C 0.6820 2.9570 1.4512  
N 0.4749 0.0513 2.1175  
C -0.1730 1.0649 2.7797  
C -0.9875 0.5196 3.8373  
C -0.8273 -0.8319 3.8018  
C 0.0895 -1.1153 2.7262  
N 2.0005 -1.7419 0.5139  
C 1.4328 -2.6632 1.3631  
C 1.9341 -3.9810 1.0679  
C 2.8256 -3.8445 0.0471  
C 2.8640 -2.4450 -0.2905  
H 4.2814 -2.5863 -1.8615  
H 3.1963 3.6951 -1.9597  
H -0.6532 3.1064 3.0906  
H 0.1587 -3.2223 2.9638  
H 5.1436 -0.5951 -3.3376  
H 4.6637 2.0750 -3.3864  
H 1.8156 5.3833 -0.4984  
H 0.1922 5.1327 1.6595  
H -1.5975 1.1097 4.5088  
H -1.2761 -1.5815 4.4407  
H 1.6417 -4.8812 1.5931  
H 3.4136 -4.6101 -0.4423  
N -4.1086 1.2709 -1.8403  
C -4.4434 1.9041 -3.0926  
H -3.8143 0.3040 -1.8390  
H -3.9110 1.3997 -3.9030  
H -4.1465 2.9553 -3.0614  
H -5.5215 1.8628 -3.2962  
N -3.4955 -0.2399 0.4019  
C -4.0603 1.0856 0.6004  
C -4.3910 1.8886 -0.6710  
O -4.8636 3.0156 -0.6034  
H -2.4909 -0.3250 0.2741  
H -4.9906 0.9852 1.1654  
H -3.3630 1.6834 1.1947  
N -2.2182 -2.6885 -0.3464  
C -3.6001 -2.6976 0.0889  
C -4.2959 -1.3312 0.2330  
O -5.5123 -1.2776 0.2359  
H -1.4757 -2.7261 0.3394  
H -4.1986 -3.2656 -0.6261  
H -3.6611 -3.2045 1.0576  
C -0.4088 -2.4136 -1.9716  
C -1.8999 -2.4720 -1.6584  
O -2.7601 -2.3141 -2.5144  
C 0.0671 -0.9726 -2.2276  
S -0.1415 0.1910 -0.8189  
H 0.1847 -2.8764 -1.1787  
H -0.2557 -2.9927 -2.8904  
H 1.1116 -0.9722 -2.5474  
H -0.5266 -0.5389 -3.0392  
O 3.1291 0.4245 1.7006

H 2.9932 1.1035 2.3788

5C)

O -5.2903 -0.7676 -1.8324

O -1.0281 1.1320 1.5961

O -3.6606 1.6777 1.8953

Fe 0.2338 0.8319 0.3006

C 2.6926 1.1632 2.6573

C 0.4319 4.1693 -0.4090

C -2.1641 0.4552 -2.0975

C 0.0264 -2.5412 1.0090

N 1.3632 2.3456 0.9620

C 2.3163 2.3006 1.9591

C 2.8754 3.6205 2.1852

C 2.2181 4.4513 1.3216

C 1.2783 3.6616 0.5719

C 3.9595 3.9647 3.1697

N -0.7282 2.0813 -0.9400

C -0.4864 3.4242 -1.1311

C -1.3047 3.9327 -2.2244

C -2.0109 2.8632 -2.6830

C -1.6515 1.7222 -1.8904

C -1.3744 5.3391 -2.7361

N -0.8030 -0.7339 -0.4310

C -1.7650 -0.6762 -1.4092

C -2.3415 -1.9719 -1.6223

C -1.7568 -2.8334 -0.7463

C -0.7906 -2.0436 0.0046

C -2.0817 -4.2864 -0.5684

N 1.1479 -0.4355 1.6016

C 0.9439 -1.7955 1.7407

C 1.8394 -2.3390 2.7475

C 2.5841 -1.2788 3.1900

C 2.1543 -0.1062 2.4803

C 1.9188 -3.7695 3.2115

H 3.4707 1.2681 3.4064

H 0.5122 5.2284 -0.6313

H -2.9615 0.3350 -2.8208

H -0.0441 -3.6011 1.2287

H 2.3557 5.5188 1.1976

H 4.1912 5.0330 3.1273

H 4.8851 3.4135 2.9614

H -2.7292 2.8394 -3.4927

H -2.0713 5.4030 -3.5767

H -0.3977 5.6994 -3.0836

H -3.1475 -2.1603 -2.3186

H -2.4969 -4.4897 0.4276

H -1.1979 -4.9258 -0.6887

H 3.3588 -1.2878 3.9477

H 2.7084 -3.8848 3.9597

H 2.1358 -4.4559 2.3837

H 0.9764 -4.1005 3.6660

H -1.7186 6.0380 -1.9625

H 3.6644 3.7273 4.1995

H -2.8230 -4.5991 -1.3093

N 2.1772 -2.9052 -1.8787

C 1.1236 -3.1710 -2.8451  
H 2.1720 -1.9971 -1.4271  
H 0.6937 -4.1653 -2.6821  
H 1.5129 -3.1426 -3.8689  
N 4.4392 -1.8538 -0.4917  
C 4.4979 -3.1887 -1.0589  
C 3.3520 -3.5700 -2.0117  
O 3.4982 -4.4885 -2.8054  
H 4.0231 -1.7187 0.4194  
H 5.4188 -3.2969 -1.6350  
H 4.5229 -3.9163 -0.2409  
C 4.4135 0.5934 -0.6518  
C 4.6652 -0.7670 -1.2934  
O 5.0159 -0.8845 -2.4617  
C 3.2709 1.3193 -1.3756  
S 1.6930 0.3712 -1.4019  
H 4.1972 0.5085 0.4173  
H 5.3292 1.1882 -0.7649  
C -4.6803 3.1701 -0.7604  
O -4.8425 1.7777 -0.6087  
H -5.4097 3.7427 -0.1615  
H -4.5195 1.5495 0.2933  
N -5.2597 -2.8462 1.9268  
C -5.9659 -3.3685 0.7795  
H -5.3533 -3.3145 2.8153  
H -6.9314 -3.7752 1.0946  
H -5.4007 -4.1628 0.2731  
H -6.1389 -2.5624 0.0633  
C -3.6719 -1.4278 3.0862  
C -4.3854 -1.8134 1.8191  
O -4.1697 -1.2281 0.7587  
H -4.0514 -1.9336 3.9802  
H -3.7570 -0.3434 3.2064  
H -2.6071 -1.6631 2.9740  
H -4.8739 -1.0937 -1.0136  
H -5.3499 0.1868 -1.6310  
H -2.7385 1.3989 1.6580  
H -4.8472 3.4204 -1.8128  
H -3.6716 3.5068 -0.4866  
H 3.1064 2.3127 -0.9559  
H 3.5328 1.4287 -2.4324  
H 0.3417 -2.4204 -2.7310  
H -3.5521 2.5938 2.1928  
H -0.8119 0.5728 2.3608

5 Imz)

Fe 1.7021 0.2450 0.5527  
C 3.6942 -1.7951 -1.3690  
C 2.6892 2.9350 -1.2795  
C -0.0791 2.3113 2.6289  
C 0.6098 -2.4580 2.2976  
N 2.9285 0.5068 -1.0323  
C 3.6848 -0.4290 -1.6824  
C 4.4557 0.1751 -2.7399  
C 4.1530 1.5037 -2.7265  
C 3.2086 1.6997 -1.6545

N 1.3265 2.2289 0.6288  
C 1.8332 3.1859 -0.2011  
C 1.4101 4.5038 0.2125  
C 0.6507 4.3336 1.3289  
C 0.6070 2.9126 1.5807  
N 0.4543 -0.0202 2.1174  
C -0.1547 0.9335 2.8770  
C -0.8986 0.3351 3.9608  
C -0.7258 -1.0103 3.8497  
C 0.1319 -1.2212 2.7069  
N 2.0682 -1.7389 0.4603  
C 1.5263 -2.6994 1.2621  
C 2.0487 -4.0024 0.9310  
C 2.9353 -3.8182 -0.0873  
C 2.9379 -2.4058 -0.3755  
H 4.3454 -2.4324 -1.9601  
H 3.0108 3.7963 -1.8578  
H -0.6055 2.9656 3.3177  
H 0.2724 -3.3247 2.8586  
H 5.1335 -0.3551 -3.3960  
H 4.5350 2.2872 -3.3675  
H 1.6801 5.4265 -0.2841  
H 0.1651 5.0868 1.9353  
H -1.4664 0.8829 4.7014  
H -1.1194 -1.7945 4.4828  
H 1.7748 -4.9249 1.4258  
H 3.5343 -4.5582 -0.6015  
O 3.0539 0.4813 1.6926  
H -2.8425 0.4846 -1.7993  
H -1.3999 1.2418 0.1481  
C -1.0884 0.5692 -0.6352  
H 0.9135 -1.3515 -2.2136  
N 0.1052 0.0016 -0.7445  
H -1.5922 -1.1117 -3.3567  
C 0.0630 -0.7749 -1.8886  
C -1.1701 -0.6690 -2.4682  
N -1.8863 0.1887 -1.6572  
H 3.8285 -0.0298 1.4013

5 Fluoride)

Fe 0.0019 0.0016 -0.2861  
N 1.3966 -1.4587 -0.2358  
N 1.4507 1.3862 -0.2705  
N -1.3937 1.4613 -0.2437  
N -1.4538 -1.3896 -0.3002  
C 1.1705 -2.8110 -0.2532  
C 2.4264 -3.5221 -0.2511  
C 3.4096 -2.5823 -0.2484  
C 2.7565 -1.2955 -0.2491  
C 3.4228 -0.0799 -0.2696  
C 2.8050 1.1611 -0.2861  
C 3.5133 2.4160 -0.3075  
C 2.5731 3.3998 -0.3102  
C 1.2873 2.7492 -0.2905  
C 0.0756 3.4227 -0.2791  
C -1.1690 2.8123 -0.2602

C -2.4249 3.5231 -0.2649  
C -3.4083 2.5835 -0.2676  
C -2.7549 1.2966 -0.2644  
C -3.4232 0.0817 -0.2875  
C -2.8106 -1.1632 -0.3033  
C -3.5160 -2.4179 -0.3106  
C -2.5746 -3.4030 -0.3079  
C -1.2892 -2.7552 -0.2990  
C -0.0734 -3.4236 -0.2780  
H 2.5208 -4.6004 -0.2530  
H 4.4826 -2.7255 -0.2479  
H 4.5077 -0.1006 -0.2802  
H 4.5916 2.5108 -0.3144  
H 2.7168 4.4727 -0.3198  
H 0.1041 4.5074 -0.2927  
H -2.5192 4.6014 -0.2677  
H -4.4812 2.7266 -0.2729  
H -4.5081 0.1055 -0.2962  
H -4.5941 -2.5147 -0.3083  
H -2.7202 -4.4757 -0.3030  
H -0.0988 -4.5085 -0.2836  
F -0.0228 -0.0174 1.4507  
O 0.0152 0.0095 -2.0576  
H -0.6436 -0.6210 -2.3946

6 A)

Fe 0.0298 -0.0050 -0.3714  
N 1.4335 -1.4637 -0.3273  
N 1.4944 1.3886 -0.3139  
N -1.3707 1.4513 -0.2976  
N -1.4299 -1.4013 -0.3017  
C 1.2085 -2.8118 -0.3081  
C 2.4663 -3.5289 -0.3327  
C 3.4489 -2.5894 -0.3740  
C 2.7899 -1.3004 -0.3695  
C 3.4546 -0.0801 -0.3880  
C 2.8426 1.1684 -0.3578  
C 3.5546 2.4278 -0.3534  
C 2.6121 3.4081 -0.3049  
C 1.3259 2.7455 -0.2848  
C 0.1048 3.4087 -0.2635  
C -1.1444 2.7996 -0.2799  
C -2.4009 3.5168 -0.3048  
C -3.3853 2.5782 -0.3491  
C -2.7279 1.2889 -0.3459  
C -3.3921 0.0673 -0.3771  
C -2.7798 -1.1808 -0.3534  
C -3.4907 -2.4402 -0.3667  
C -2.5471 -3.4208 -0.3256  
C -1.2615 -2.7584 -0.2936  
C -0.0392 -3.4219 -0.2843  
H 2.5612 -4.6082 -0.3192  
H 4.5226 -2.7330 -0.3993  
H 4.5406 -0.1029 -0.4177  
H 4.6334 2.5266 -0.3786  
H 2.7527 4.4823 -0.2842

H 0.1288 4.4950 -0.2467  
H -2.4953 4.5962 -0.2909  
H -4.4588 2.7235 -0.3774  
H -4.4779 0.0900 -0.4150  
H -4.5692 -2.5398 -0.3997  
H -2.6875 -4.4952 -0.3206  
H -0.0628 -4.5084 -0.2753  
S 0.1619 0.0352 2.1338  
O 0.0133 -0.0018 -2.0121  
C -1.5314 -0.2266 2.7948  
H -1.4943 -0.1837 3.8896  
H -1.9357 -1.2031 2.5058  
H -2.2265 0.5464 2.4483  
6B)  
Fe 2.1204 0.1770 0.2658  
C 2.9598 -1.2757 -2.7193  
C 2.3243 3.2650 -1.1755  
C 1.2768 1.6273 3.2525  
C 1.6540 -2.9183 1.6421  
N 2.5238 0.8581 -1.5951  
C 2.8887 0.1124 -2.6819  
C 3.1797 0.9773 -3.8039  
C 2.9859 2.2533 -3.3723  
C 2.5836 2.1662 -1.9862  
N 1.8413 2.0737 0.9112  
C 1.9883 3.2129 0.1713  
C 1.7599 4.3770 0.9993  
C 1.4792 3.9179 2.2484  
C 1.5309 2.4737 2.1799  
N 1.5566 -0.5094 2.0870  
C 1.2849 0.2384 3.1979  
C 0.9791 -0.6248 4.3172  
C 1.0697 -1.9031 3.8601  
C 1.4385 -1.8183 2.4637  
N 2.2455 -1.7245 -0.4175  
C 2.0487 -2.8659 0.3096  
C 2.3280 -4.0282 -0.5039  
C 2.7106 -3.5664 -1.7263  
C 2.6567 -2.1235 -1.6598  
H 3.2671 -1.7352 -3.6544  
H 2.4074 4.2484 -1.6295  
H 1.0368 2.0881 4.2064  
H 1.5277 -3.9023 2.0845  
H 3.4854 0.6332 -4.7844  
H 3.1011 3.1788 -3.9230  
H 1.8103 5.4009 0.6498  
H 1.2482 4.4844 3.1421  
H 0.7247 -0.2780 5.3113  
H 0.9098 -2.8284 4.4001  
H 2.2399 -5.0532 -0.1651  
H 2.9999 -4.1328 -2.6031  
N -5.1095 0.9802 -1.4515  
C -5.8782 1.2103 -2.6508  
H -4.6591 0.0854 -1.3072  
H -5.5397 0.5221 -3.4298  
H -5.7349 2.2409 -2.9874



H -6.9532 1.0563 -2.4840  
N -3.6741 0.2040 0.7791  
C -4.3340 1.4957 0.8142  
C -5.1252 1.8854 -0.4465  
O -5.7192 2.9555 -0.5207  
H -2.6803 0.1826 0.5211  
H -5.0412 1.5190 1.6487  
H -3.5801 2.2713 0.9788  
N -2.3175 -2.2636 0.3193  
C -3.4945 -2.2339 1.1601  
C -4.3182 -0.9312 1.1674  
O -5.4851 -0.9538 1.5333  
H -1.4720 -1.7987 0.6529  
H -4.1821 -3.0207 0.8442  
H -3.1944 -2.4421 2.1935  
C -1.1552 -2.0731 -1.8089  
C -2.4450 -2.3324 -1.0430  
O -3.5205 -2.5677 -1.5890  
C -0.7869 -0.5691 -1.8913  
S -0.4038 0.2639 -0.2913  
H -0.3268 -2.6193 -1.3470  
H -1.3081 -2.4636 -2.8217  
H 0.0792 -0.4694 -2.5518  
H -1.6147 -0.0282 -2.3645  
O 3.6966 0.1925 0.6835  
6Imz)  
Fe 1.7951 0.2536 0.6166  
C 3.6893 -1.7926 -1.3710  
C 2.7237 2.9499 -1.2720  
C -0.1021 2.3020 2.6057  
C 0.6344 -2.4748 2.3217  
N 2.9422 0.5183 -1.0233  
C 3.6878 -0.4346 -1.6687  
C 4.4611 0.1703 -2.7288  
C 4.1752 1.5003 -2.7115  
C 3.2333 1.7097 -1.6360  
N 1.3607 2.2276 0.6368  
C 1.8686 3.1857 -0.2025  
C 1.4058 4.4945 0.1970  
C 0.6259 4.3158 1.2979  
C 0.6061 2.8965 1.5669  
N 0.4903 -0.0321 2.1336  
C -0.1492 0.9365 2.8647  
C -0.9091 0.3332 3.9352  
C -0.7157 -1.0107 3.8431  
C 0.1680 -1.2284 2.7212  
N 2.0723 -1.7408 0.4734  
C 1.5342 -2.7033 1.2880  
C 2.0566 -4.0036 0.9360  
C 2.9289 -3.8110 -0.0902  
C 2.9340 -2.3937 -0.3706  
H 4.3316 -2.4343 -1.9665  
H 3.0465 3.8102 -1.8506  
H -0.6588 2.9563 3.2700  
H 0.2934 -3.3382 2.8849  
H 5.1298 -0.3684 -3.3885

H 4.5626 2.2827 -3.3520  
H 1.6634 5.4187 -0.3049  
H 0.1074 5.0621 1.8867  
H -1.5040 0.8823 4.6544  
H -1.1167 -1.7951 4.4727  
H 1.7863 -4.9297 1.4277  
H 3.5223 -4.5461 -0.6194  
O 3.0477 0.4377 1.6228  
H -2.8735 0.5002 -1.7506  
H -1.3893 1.2242 0.1908  
C -1.0951 0.5661 -0.6124  
H 0.8865 -1.3171 -2.2438  
N 0.0917 0.0045 -0.7501  
H -1.6441 -1.0688 -3.3554  
C 0.0338 -0.7509 -1.9034  
C -1.2086 -0.6405 -2.4662  
N -1.9164 0.2034 -1.6303  
6 Fluoride)  
Fe 0.0008 0.0004 -0.3621  
N 1.4013 -1.4652 -0.2868  
N 1.4663 1.4010 -0.2883  
N -1.4000 1.4660 -0.2946  
N -1.4649 -1.4003 -0.2931  
C 1.1747 -2.8111 -0.2829  
C 2.4329 -3.5297 -0.2708  
C 3.4168 -2.5895 -0.2692  
C 2.7560 -1.2998 -0.2804  
C 3.4200 -0.0771 -0.2784  
C 2.8122 1.1744 -0.2817  
C 3.5308 2.4327 -0.2715  
C 2.5905 3.4166 -0.2752  
C 1.3009 2.7557 -0.2859  
C 0.0782 3.4198 -0.2877  
C -1.1734 2.8119 -0.2913  
C -2.4317 3.5306 -0.2865  
C -3.4155 2.5903 -0.2863  
C -2.7547 1.3006 -0.2939  
C -3.4187 0.0779 -0.2933  
C -2.8109 -1.1736 -0.2925  
C -3.5295 -2.4319 -0.2848  
C -2.5892 -3.4158 -0.2814  
C -1.2996 -2.7550 -0.2883  
C -0.0769 -3.4190 -0.2841  
H 2.5285 -4.6094 -0.2620  
H 4.4910 -2.7339 -0.2587  
H 4.5069 -0.1020 -0.2714  
H 4.6104 2.5283 -0.2608  
H 2.7350 4.4908 -0.2681  
H 0.1030 4.5066 -0.2842  
H -2.5273 4.6102 -0.2802  
H -4.4897 2.7347 -0.2801  
H -4.5056 0.1027 -0.2912  
H -4.6092 -2.5276 -0.2794  
H -2.7337 -4.4900 -0.2728  
H -0.1017 -4.5059 -0.2789  
F -0.0032 0.0014 1.4651

O 0.0043 -0.0006 -2.0111
